# Supplementary material for: Impact of national malaria control scale-up programmes in Africa: magnitude and attribution of effects
Source: Springer Nature journal article supplement (doi:10.1186/1475-2875-9-299), 2010-10-27
Supplement: 12936_2010_1381_MOESM7_ESM.pdf [file 12936_2010_1381_MOESM7_ESM.pdf]

Percent coverage

Percent anaemia/parasitaemia

- % households with at least one ITN
- % children slept under ITN last night
- % pregnant women slept under ITN last night
- % pregnant women received 2+ doses IPTp
- % HH with an ITN or IRS

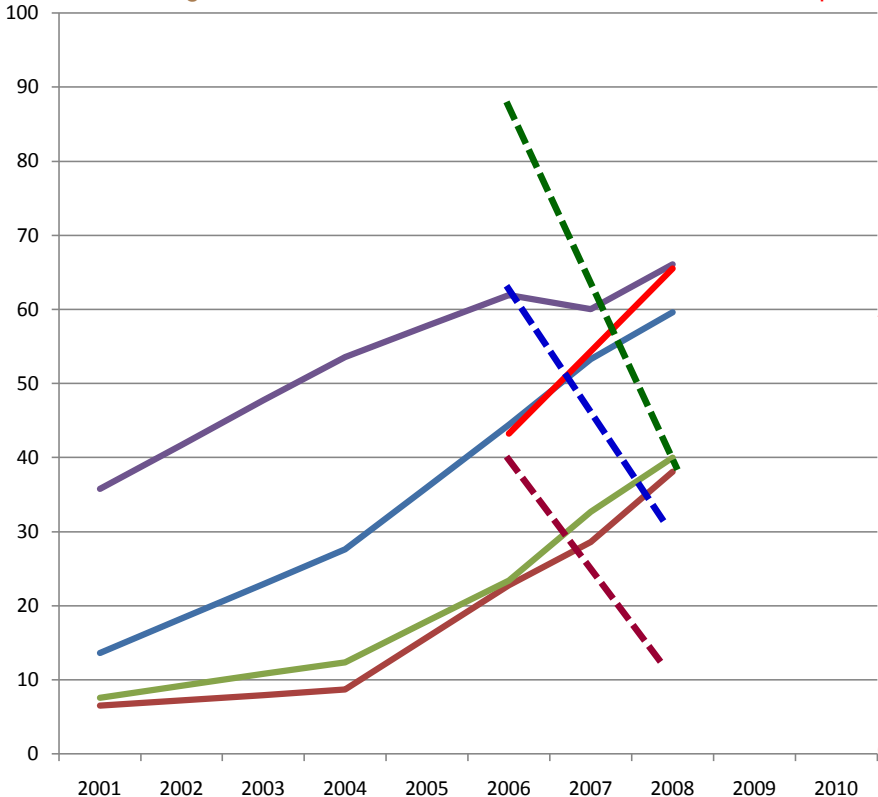

- - - % rural child parasitaemia
- - - % child parasitaemia
- - - % child anaemia
