# Supplementary figures and images for: Impact of national malaria control scale-up programmes in Africa: magnitude and attribution of effects
Source: Springer Nature journal article supplement (doi:10.1186/1475-2875-9-299), 2010-10-27

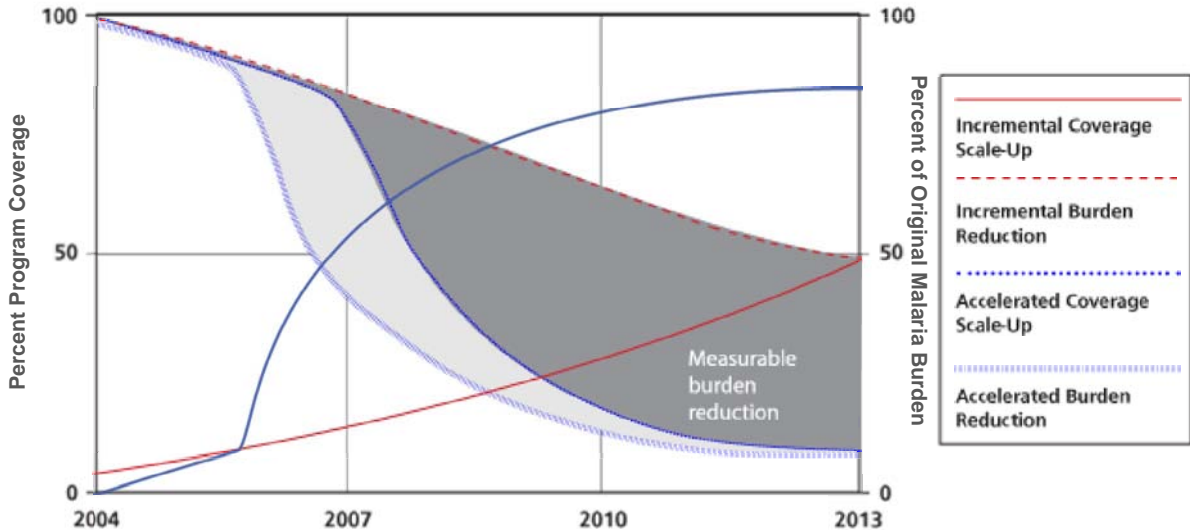

Supplement: 12936_2010_1381_MOESM1_ESM.pdf [file 12936_2010_1381_MOESM1_ESM.pdf]

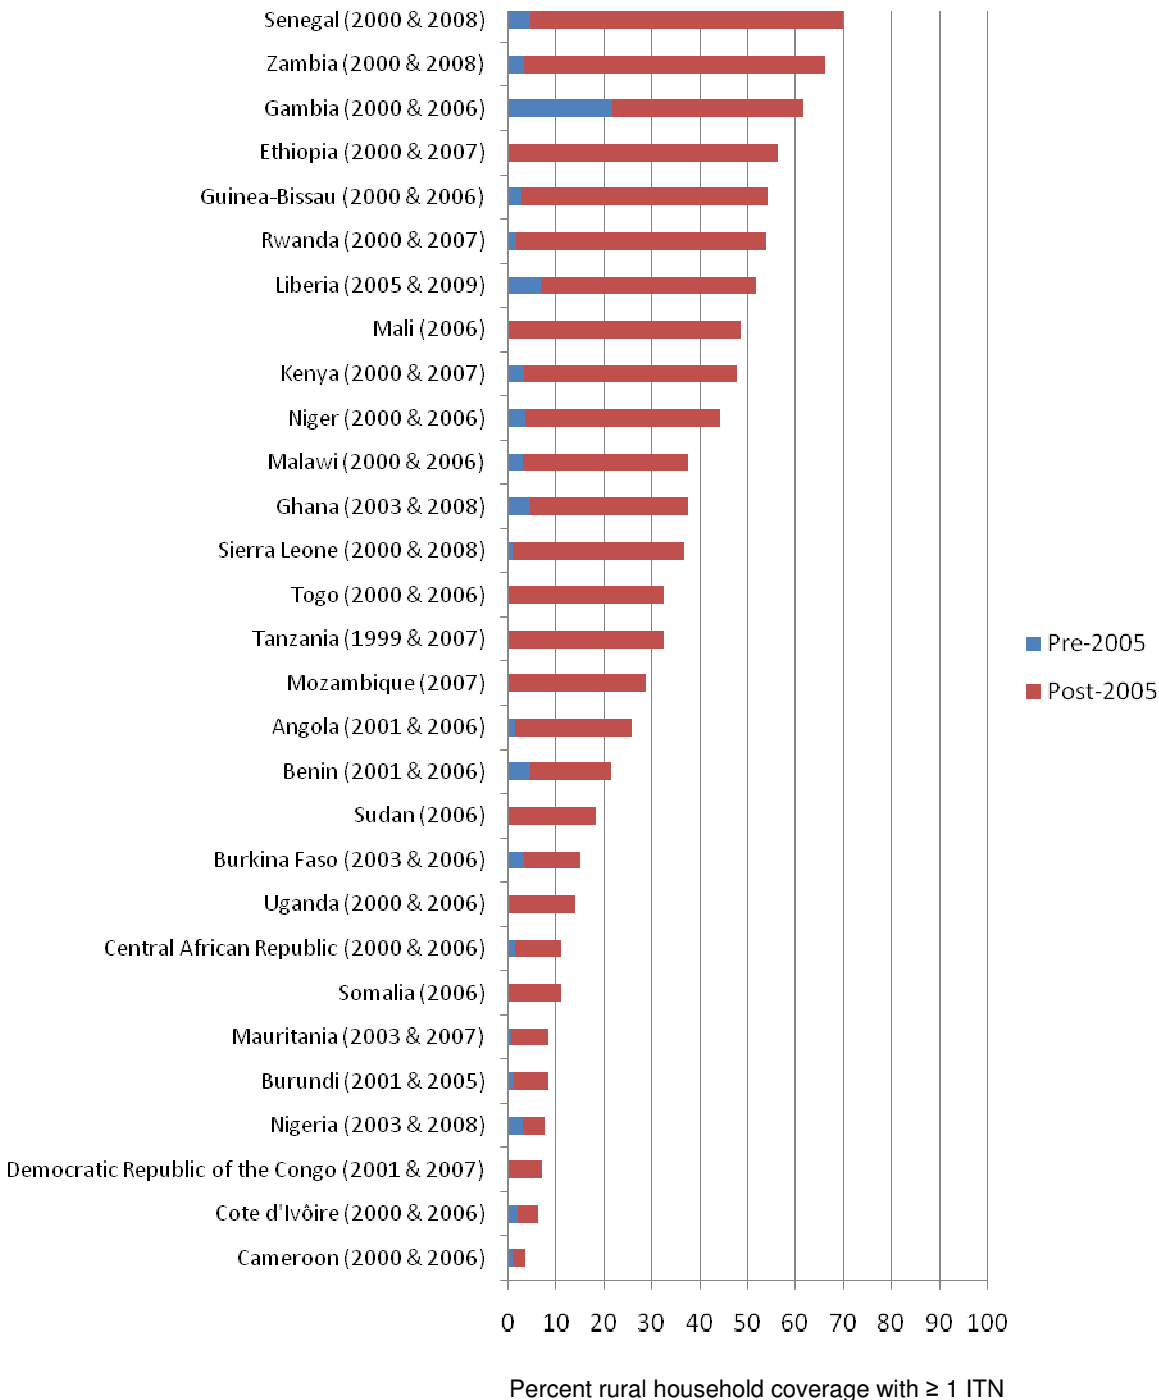

Supplement: 12936_2010_1381_MOESM2_ESM.pdf [file 12936_2010_1381_MOESM2_ESM.pdf]

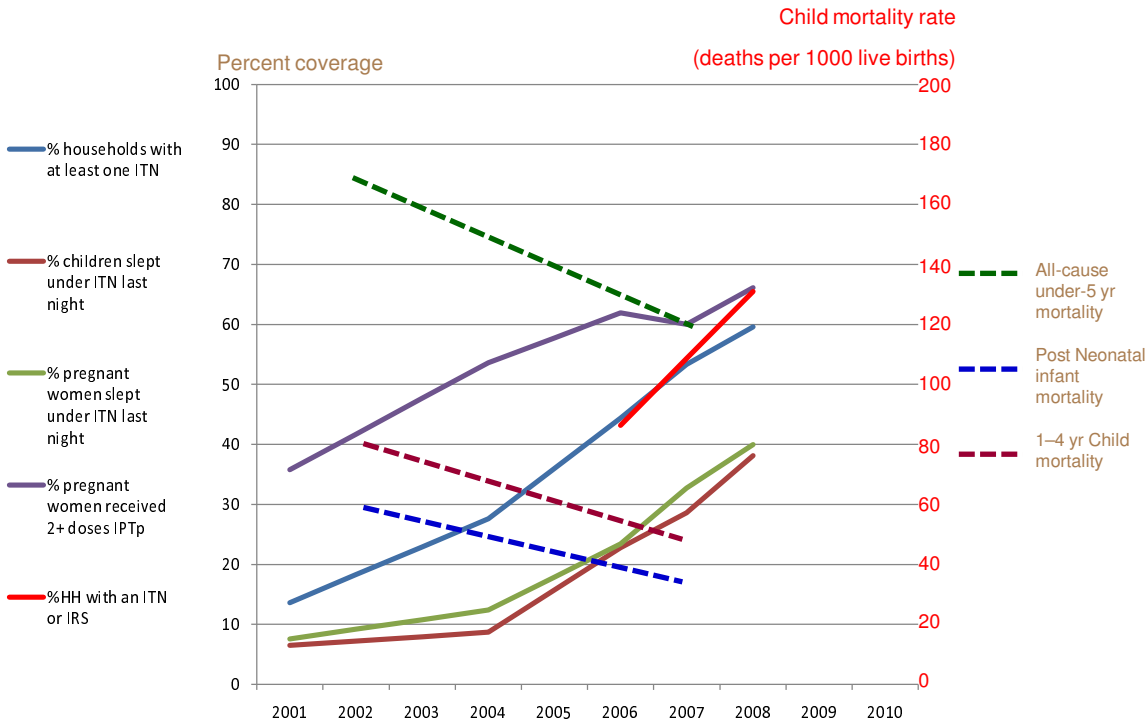

Supplement: 12936_2010_1381_MOESM8_ESM.pdf [file 12936_2010_1381_MOESM8_ESM.pdf]

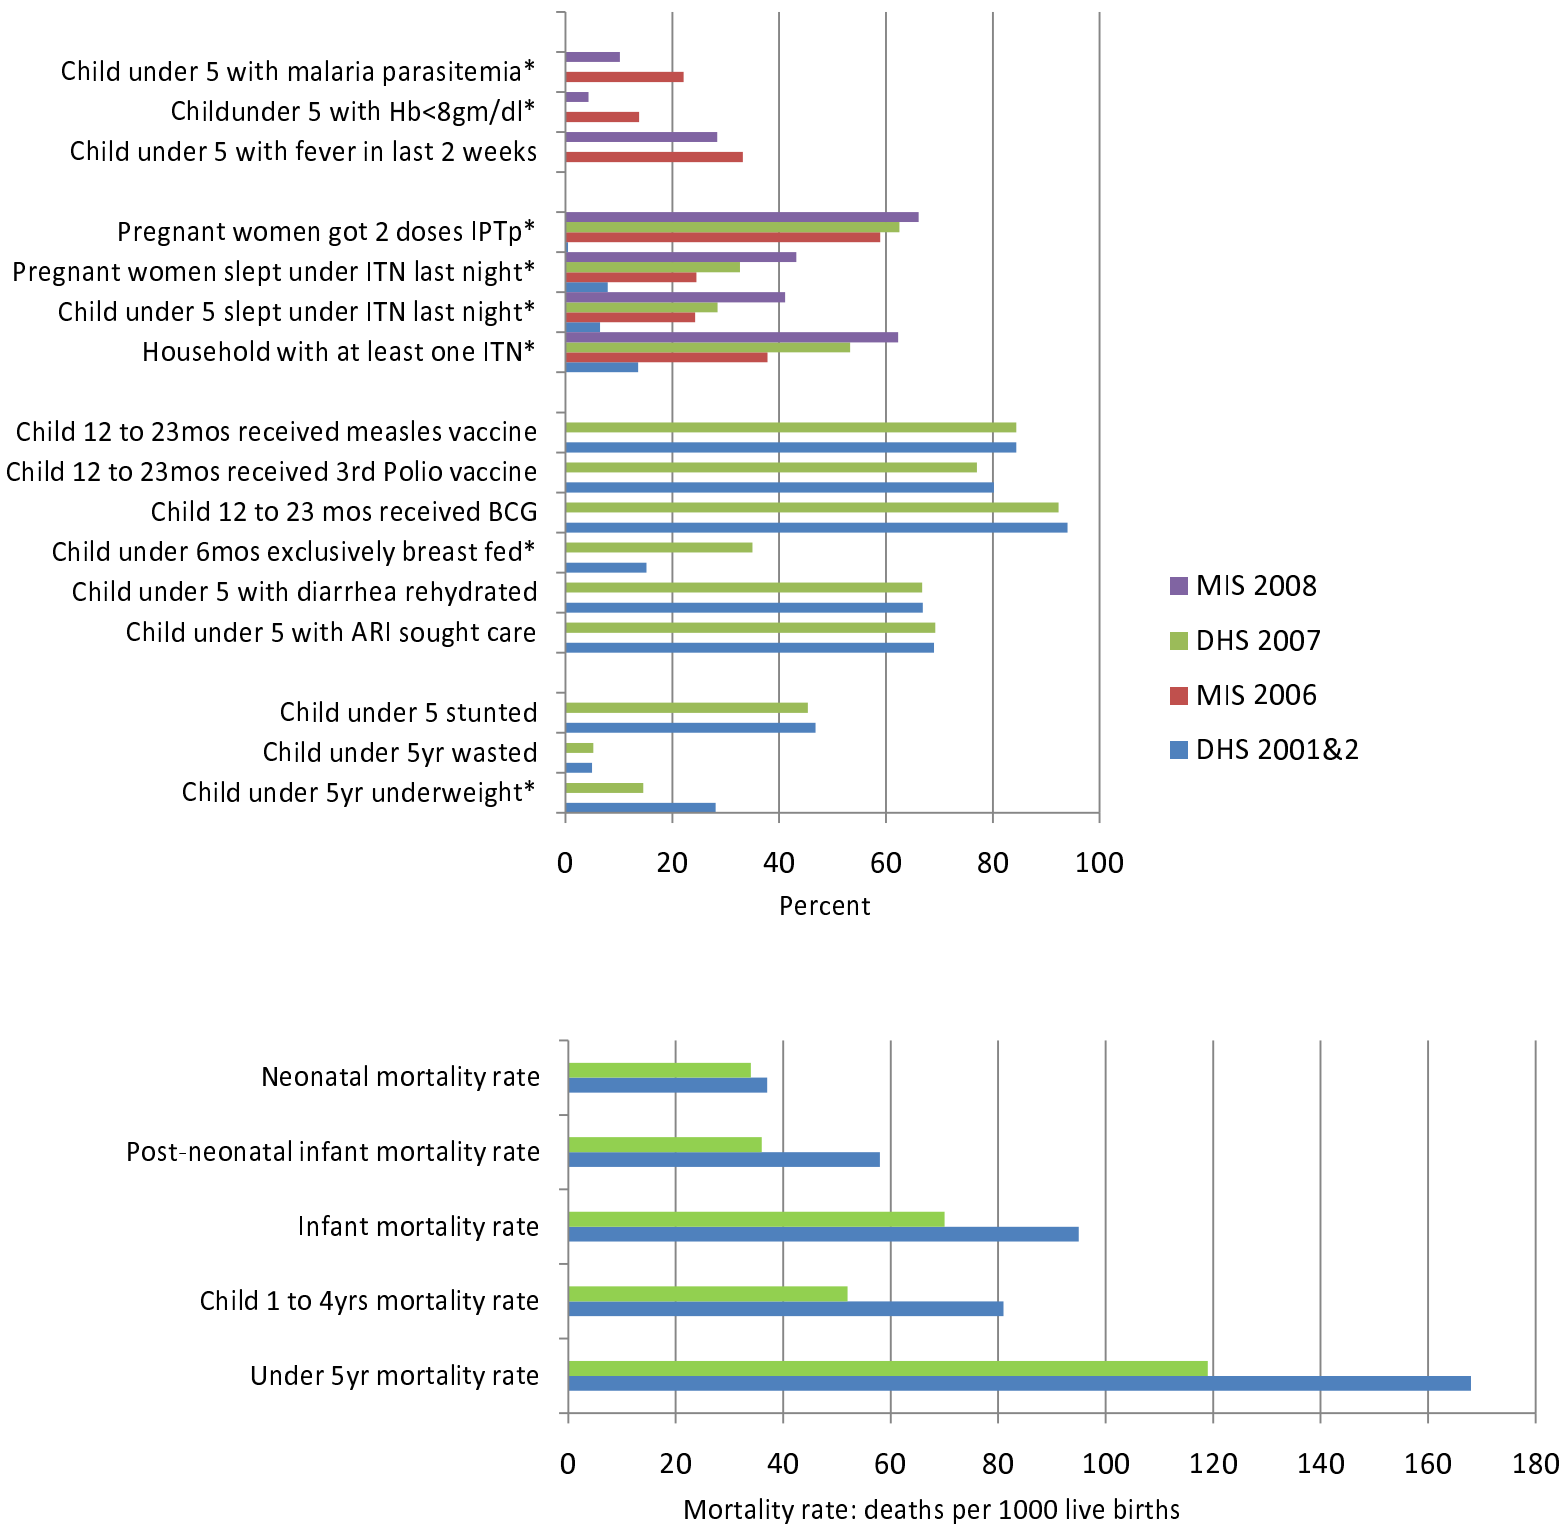

Supplement: 12936_2010_1381_MOESM9_ESM.pdf [file 12936_2010_1381_MOESM9_ESM.pdf]
